# Auditory perceptual history is communicated through alpha oscillations

Hao Tam Ho<sup>1,3,\*</sup>, Johahn Leung<sup>1,2</sup>, David C. Burr<sup>1,5,\*</sup>, David Alais<sup>1</sup>, Maria Concetta Morrone<sup>3,4</sup>

<sup>1</sup> School of Psychology, University of Sydney, Brennan MacCallum Building A18, Manning Rd, Camperdown, NSW 2006, Australia

<sup>2</sup> School of Medical Sciences, University of Sydney, Anderson Stuart Building F13 Eastern Avenue, NSW 2006, Australia

<sup>3</sup> Department of Translational Research on New Technologies in Medicine and Surgery, University of Pisa, via San Zeno 31, 56123 Pisa, Italy

<sup>4</sup> Scientific Institute Stella Maris, Viale del Tirreno, 331, 56018 Calambrone, Pisa, Italy

<sup>5</sup> Department of Neuroscience, Psychology, Pharmacology, and Child Health, University of Florence, Via di San Salvi 12, 50139 Florence, Italy

**Abbreviated title:** Prior information influences criterion oscillation

**\*Corresponding authors:** tam.ho@sydney.edu.au, dave@in.cnr.it

**Funding:** The research was supported by the Australian Research Council Discovery Project (DP150101731) and the European Research Council (FPT/2007-2013) under grant agreement 338866 Ecsplain.

**Word count:** 5,827

**Number of figures:** 8

**Competing interests:** The authors declare that no competing interests exist.

1 **Abstract**

2

3 Sensory expectations from the accumulation of information over time exert strong predictive  
4 biases on forthcoming perceptual decisions. These anticipatory mechanisms help to maintain  
5 a coherent percept in a noisy environment. Here we present novel behavioural evidence that  
6 past sensory experience biases perceptual decisions rhythmically through alpha oscillations.  
7 Participants identified the ear of origin of a brief sinusoidal tone masked by dichotic white  
8 noise, and response bias oscillated over time at  $\sim 9$  Hz. Importantly, the oscillations occurred  
9 only for trials preceded by a target to the same ear and lasted for at least two trials. These  
10 findings suggest that each stimulus elicits an oscillating memory trace, specific to the ear of  
11 origin, which subsequently biases perceptual decisions. This trace is phase-reset by the noise  
12 onset of the next trial, and remains within the circuitry of the ear in which it was elicited,  
13 modulating the sensory representations in that ear.

14

15 **Keywords:** Alpha oscillation, Auditory perception, Decision criteria, Sensory expectations,  
16 Serial dependence and Signal detection theory.

## 1 Introduction

2

3 It has been long known that perception depends heavily on expectations and perceptual  
4 experience. Helmholtz (1867) introduced the concept of *unconscious inference*, suggesting  
5 that perception is at least partly *inferential*, or *generative*. Gregory (1997) described  
6 perception as a series of *hypotheses* to be verified against sensory data, using many  
7 compelling illusions to back his view. Both suggested that perception is a proactive,  
8 *predictive* process, where the brain makes best guesses about the world to test against sensory  
9 data, updating the guesses as needed.

10         Recent techniques lend themselves to quantitative study of predictive perception. One  
11 example is *serial dependence*: under many conditions, the appearance of images in a  
12 sequence depends strongly on the stimulus presented just prior to the current one. Judgements  
13 of orientation (Fischer and Whitney, 2014), numerosity (Cicchini et al., 2014), motion (Alais  
14 et al., 2017), facial identity or gender (Lieberman et al., 2014; Taubert et al., 2016), beauty and  
15 even perceived body size (Alexi et al., 2018) are strongly biased towards the previous image.  
16 Strong serial biases are also observed in audition, so far only for pitch discrimination  
17 (Arzounian et al., 2017; Chambers and Pressnitzer, 2014). To our knowledge, no study has  
18 investigated whether other aspects of auditory processing, such as sound localisation, also  
19 exhibit serial dependence.

20         Sequential effects can last for seconds, even minutes (Chopin and Mamassian, 2012),  
21 suggesting that perception does not rely solely on the instantaneous stimulation, but on  
22 predictions conditioned by events over a long time-course. Counter-intuitively, the biases  
23 introduced by serial dependence can lead to more efficient perception (Cicchini et al., 2018):  
24 while the biases constitute perceptual errors, these errors are offset by a reduction in response  
25 variance and are therefore beneficial overall. As the world tends to remain constant over the

1 short term (Dong and Atick, 1995; Voss, 1975), past events are good predictors of the future.  
2 On the assumption that nothing has physically changed, the previous stimulus acts as a  
3 predictor, or a *prior*, to be combined with the current sensory data to enhance the signal. And  
4 on average, that predictor is useful in reducing error.

5         However, not all serial effects are positive. Classical *adaptation aftereffects* are  
6 negative (Thompson and Burr, 2009): prolonged inspection of downward motion causes  
7 stationary stimuli displayed to the same location to appear to move upwards (Addams, 1834).  
8 Similar negative aftereffects have been observed in almost every dimension, including  
9 orientation (Gibson and Radner, 1937), colour (Neitz et al., 2002), faces (Leopold et al.,  
10 2001), and numerosity (Burr and Ross, 2008). They also exist in audition and cover a  
11 similarly wide range of aspects, from auditory motion (Grantham and Wightman, 1979),  
12 sound localisation (Kashino and Nishida, 1998) and tone intensity (Reinhardt-Rutland and  
13 Anstis, 1982) to gender of human voices (Schweinberger et al., 2008) and even vocal affect  
14 (Bestelmeyer et al., 2010). While the classical paradigm usually involves long periods of  
15 adaptation, sizeable negative aftereffects can arise after very brief presentations in vision as  
16 in audition (Aagten-Murphy and Burr, 2016; Alais et al., 2017, 2015).

17         What determines whether assimilation or contrastive effects prevail, and how do the  
18 two opposing mechanisms interact? One factor is stimulus strength: strong, salient, high-  
19 contrast, long-duration stimuli tend to lead to negative aftereffects, while brief, less salient  
20 low-contrast stimuli result in positive aftereffects (Kanai and Verstraten, 2005; Pantle et al.,  
21 2000; Yoshimoto et al., 2014). Taubert et al. (2016) reported strong positive serial  
22 dependence for judgments of the gender of faces (a stable attribute) and negative aftereffects  
23 for judgments of emotion (a labile attribute, where change is important) on the same stimuli.  
24 However, negative and positive effects may also reflect individual preferences. Abrahamyan  
25 et al. (2016) found that some individuals, termed “switchers”, tend to respond opposite to

1 their previous choice, while others prefer to “remain” with whatever response they gave in  
2 the preceding trial. Finally, Chopin and Mamassian (2012) made a surprising observation  
3 within the same experiment: stimuli close in time were negatively correlated with the current  
4 percept, while those more remote positively. Importantly, their modelling results suggest that  
5 both negative and positive dependencies could be explained by a single predictive adaptation  
6 mechanism. However, how such a predictive adaptation mechanism could be implemented  
7 neurally is unclear.

8         Generally, the neuronal mechanisms underlying serial dependence are largely  
9 unknown. It is assumed that the prior is generated at mid-high levels of analysis, and fed back  
10 to early sensory areas, which in turn modify the prior (Friston, 2005; Lee and Mumford,  
11 2003; Summerfield and de Lange, 2014; Summerfield and Koechlin, 2008; Yuille and  
12 Kersten, 2006), but we do not know how this information is propagated, nor do we have a  
13 grasp on the underlying neural mechanisms. One possibility is that recursive propagation and  
14 updating of the prior is related to low-frequency neural oscillations (Friston et al., 2015;  
15 Sherman et al., 2016; VanRullen, 2017).

16         Although controversial, evidence is gathering that synchronous rhythmic neural  
17 activity may serve to bind stimulus components into a unitary percept (Buzsáki and  
18 Draguhn, 2004; Engel et al., 2001; Gray et al., 1989). Besides the neural evidence in animals  
19 and humans, recent psychophysical evidence shows that neural oscillations in mammalian  
20 brain modulate perceptual performance, and that these oscillations can be synchronized either  
21 by abrupt perceptual stimuli (Fiebelkorn et al., 2013, 2011; Landau and Fries, 2012), or by  
22 motor-action (hand or eye movements) (Benedetto et al., 2018, 2016; Benedetto and  
23 Morrone, 2017; Tomassini et al., 2017, 2015). Using *signal detection theory* (Green and  
24 Swets, 1966; Macmillan and Creelman, 2004), we have recently shown within the same  
25 experimental setup that oscillations can occur in both *sensitivity* (accuracy) and *criterion*

1 (response bias) at different frequencies (theta for sensitivity, alpha for criterion), suggesting  
2 separate mechanisms underlying those two perceptual properties (Ho et al., 2017).  
3 Oscillations in bias could plausibly reflect the reverberation of recursive error propagation  
4 within a generative perception framework.

5         Alpha oscillations in criteria are consistent with EEG evidence of an association  
6 between criteria shifts and modulations of alpha power (Craddock et al., 2017; Haegens et al.,  
7 2014; Iemi et al., 2017; Iemi and Busch, 2018; Limbach and Corballis, 2016) and phase  
8 (Sherman et al., 2016). Decreases in alpha power consistently coincide with more liberal  
9 decision criteria in vision (Iemi et al., 2017; Iemi and Busch, 2018; Limbach and Corballis,  
10 2016) as well as touch (Craddock et al., 2017; Haegens et al., 2014). Notably, the alpha  
11 modulation can be observed several hundred milliseconds before stimulus onset (Craddock et  
12 al., 2017; Limbach and Corballis, 2016), suggesting that criteria shifts are driven, at least in  
13 part, by alpha oscillations. This notion is further supported by the observation that the phase  
14 of prestimulus alpha can predict criteria changes (Sherman et al., 2016). Furthermore, the  
15 relationship between prestimulus alpha and criteria change was strongly influenced by target  
16 expectancy, reinforcing the view that alpha oscillations are involved in sensory anticipation  
17 or prediction (de Lange et al., 2013; Klimesch et al., 1998; Mayer et al., 2016; Premereur et  
18 al., 2012; Rohenkohl and Nobre, 2011; Sanders et al., 2014).

19         VanRullen and Macdonald (2012) have proposed an oscillatory mechanism by which  
20 past perceptual history is stored in memory. By cross-correlating the EEG response with the  
21 corresponding visual stimulus, they showed that random, non-periodic luminance changes  
22 elicited a “perceptual echo”, a reverberatory response at ~10 Hz that lasted for at least 1 s.  
23 Recent findings have confirmed that this long-lasting oscillation serves to maintain sensory  
24 representations over time (Chang et al., 2017; Huang et al., 2018), which could influence  
25 subsequent perception.

1            Given these findings, we hypothesised that the alpha oscillations observed in criteria  
 2 (Ho et al., 2017) may underlie a predictive mechanism that biases perceptual decisions,  
 3 giving rise to sequential effects. To test this idea, we asked participants to indicate the ear of  
 4 origin of a brief monaural sinusoidal tone masked by uncorrelated streams of dichotic white  
 5 noise in each ear (illustrated in Fig. 1A). The tone was presented at random intervals after the  
 6 noise onset which served to reset the phase of ongoing neural oscillations. From our previous  
 7 work (Ho et al., 2017), we expected decision criterion to oscillate at alpha frequencies (8–12  
 8 Hz). If these oscillations are instrumental in communicating perceptual expectations, the  
 9 rhythmic fluctuations in criteria should be contingent on the previous stimuli.  
 10

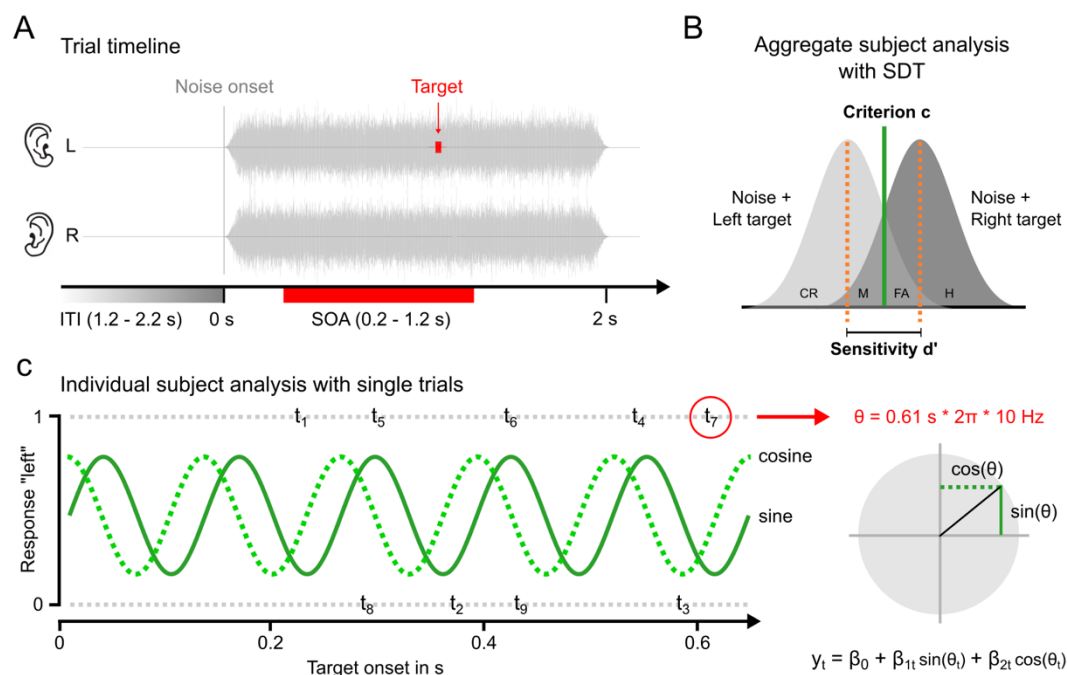

11  
 12 **Figure 1.** (A) Schematic of a trial. On each trial, white noise was presented simultaneously to  
 13 both ears for 2 s. A pure tone of 1 kHz and 10 ms duration was delivered with equiprobability  
 14 to the left or right ear. The SOA was randomly selected from an interval of 0.2-1.2 s post  
 15 noise onset. The ITI jittered randomly between 1.2-2.2 s. (B) Application of signal detection  
 16 theory (SDT). To look for oscillations in sensitivity and criterion, we first pooled across all  
 17 15 participants (creating an aggregate subject) and binned the data with non-overlapping,  
 18 rectangular windows of 10 ms. For each bin, we calculated d-prime ( $d'$ ) and decision  
 19 criterion ( $c$ ) using the hits (H) and false alarm (FA) from the left- and right-target conditions,  
 20 respectively. (M: misses, CR: correct rejections). The calculations follow the Equations 1-2.  
 21 (C) Schematic illustration of the linear regression analysis based on single trials. We

1 computed the sine and cosine of the time at which the target was presented ( $t = 1, 2 \dots n$ ) for  
2 every tested frequency from 4-12 Hz (in 0.01-Hz steps). Based on the sine and cosine  
3 regressors, we estimated parameters  $\beta_1$  and  $\beta_2$  ( $\beta_0$  is a constant) for all responses (coded as 0  
4 = 'left' and 1 = 'right') in  $y$ .

5

6

## 7 **Results**

8

### 9 *Stimulus history affects response bias but not sensitivity*

10 Participants performed a two-alternative forced-choice (2AFC) task which required them to  
11 identify the ear of origin of a weak, brief tone (10 ms) embedded in white noise (2 s in  
12 duration). The target tone was delivered randomly with equal probability in either ear with a  
13 stimulus-onset asynchrony (SOA) randomly drawn from an interval of 0.2–1.2 s post noise  
14 onset. Using a staircase procedure, we kept the target's intensity around individuals'  
15 thresholds (75 % accuracy).

16 We first examined whether observer sensitivity and response bias, as measured  
17 respectively by d-prime ( $d'$ ) and decision criterion ( $c$ ) (Eq. 1&2, see also Fig. 1B), were  
18 contingent on the preceding stimuli. As shown in Fig. 2A, stimulus history did not influence  
19 observer sensitivity. Whether the last target (1-back) and second-last target (2-back) occurred  
20 in the left or right ear had no effect on detecting the current target: the difference in  
21 sensitivity contingent on the preceding left (blue bars) and right stimuli (red bars) was not  
22 statistically significant after multiple comparison correction (with FDR = 5 %),  $p = 0.07$  and  
23  $p = 0.56$  for 1- and 2-back, respectively. However, Fig. 2B shows that criterion was affected  
24 by stimulus history. Curiously, there was no significant 1-back effect (when FDR adjusted),  $p$   
25 = 0.86, but a strong 2-back effect ( $p = 0.0002$ ) of observer response biases towards the  
26 previously presented stimulus, either left or right. The effects remained significant for stimuli



1 three trials back,  $p = 0.008$ , and four trials back,  $p = 0.009$ , but was non-significant five trials  
2 back,  $p = 0.85$ .

3 We then examined the dependency of the *previous response* (Fig. 2C), which revealed  
4 a *negative* influence of one trial back, marginally significant after FDR correction  
5 ( $p = 0.053$ ). This response-dependent negative serial dependence could result from response  
6 switching, mentioned in the Introduction. However, two trials back, which should not be  
7 affected by response switching, showed the same positive aftereffect found for the stimulus-  
8 based analysis,  $p = 0.0001$  (FDR corrected). Trials further in the past (not shown) had no  
9 significant effect, all  $p$ 's  $> 0.05$ . Even though not statistically robust, this repulsive effect  
10 could account for the stimulus-based null effect in the 1-back (Fig. 2B), discussed further in  
11 the Discussion section.

12 To gain a better understanding of the sequential effects in response bias, we examined  
13 the effects in individual subjects. Figure 2D plots the individual biases (differences in  
14 responses preceded by left from those preceded by right) for 1-back trials against 2-back  
15 trials. All subjects except one (subject 5) showed a positive serial effect for trials that were 2-  
16 back, while there was much greater subject variability in the 1-back condition, with 5  
17 participants showing a positive and the remaining 9 showing a negative effect. This pattern of  
18 results is consistent with previous reports of individual differences in switching responses  
19 from one trial to the next (Abrahamyan et al., 2016).

20 That both negative and positive effects are observed only for criteria is particularly  
21 interesting, as we have previously shown that response biases oscillate at low alpha  
22 frequencies,  $\sim 8$  Hz, and there is evidence that alpha oscillations are involved in predictive  
23 processes and modulation of decision criteria (de Lange et al., 2013; Sherman et al., 2016). In  
24 a preliminary analysis of the temporal dynamics of the 1-back effect, we sorted the individual  
25 response data by target SOA (from noise onset) and grouped them into 12 bins of 83 ms,

1 computed the difference in left and right bias contingent on the preceding trial and averaged  
 2 across all participants. As can be seen from Fig. 2E, the effect of stimulus history on response  
 3 bias oscillates smoothly over time, warranting further investigation.  
 4

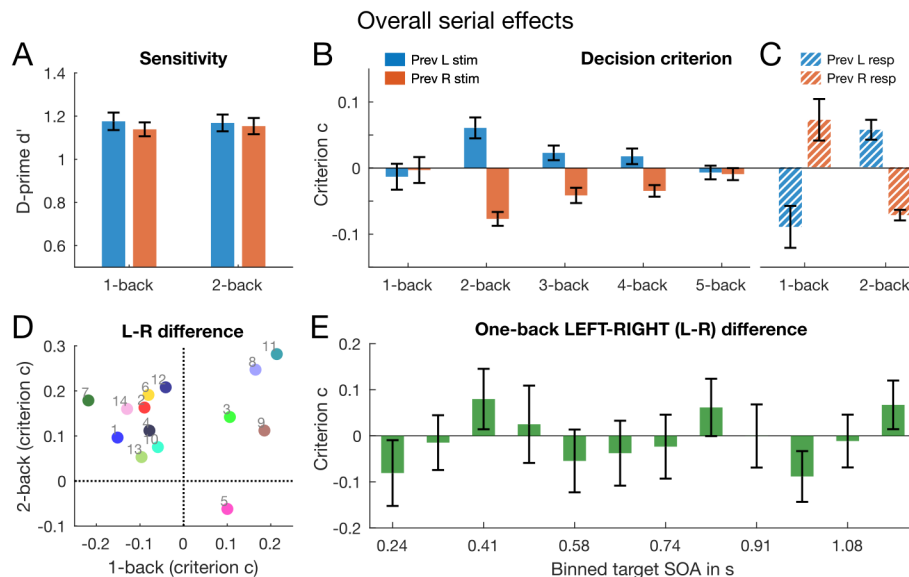

5 **Figure 2.** Results of the serial dependence analysis. **(A)** Group mean sensitivity contingent  
 6 on whether the last (1-back) and second last (2-back) target occurred the left (blue bars) or  
 7 right ear (red bars). There was no significant influence of stimulus history on observer  
 8 sensitivity. **(B)** Group mean response bias contingent on the ear of origin of the preceding 1-  
 9 to 5-back stimuli. The difference between the contingent left and right (blue and red bars,  
 10 respectively) are significant for the 2-, 3- and 4-back stimuli (FDR corrected). **(C)** Group  
 11 mean response bias contingent on the response 1-2 trials back. The difference between the  
 12 contingent left and right (blue and red bars, respectively) is significant for both 1- and 2-back  
 13 (FDR corrected). **(D)** Individual stimulus-based bias differences in the 1-back plotted against  
 14 those in the 2-back. These differences were computed by subtracting the contingent left bias  
 15 (blue bars in (B)) from the contingent right bias (red bars). Except for subject 5, all other  
 16 subjects show a positive bias difference in the 2-back. In contrast, there was greater subject  
 17 variability in the 1-back, with only 5 participants showing a positive effect. **(E)** Temporal  
 18 dynamics of the 1-back effect. The individual response data were grouped into 12 bins of 83  
 19 ms. For each bin, we computed the difference in left and right bias contingent on the  
 20 preceding trial as in (C) and averaged across all participants. Not only does the difference in  
 21 bias change from negative to positive but it also increases and decreases in a smooth  
 22 transition depending on the target SOA (from noise onset), suggesting that the 1-back effect  
 23 fluctuates rhythmically over time. All error bars indicate  $\pm 1$  MSE.  
 24

25  
 26

27

## 1 ***Oscillation of response bias but not sensitivity***

2 We applied two different methods to examine response bias and sensitivity for rhythmic  
3 fluctuations. The first is the same *curve fitting* approach we used in our previous study (Ho et  
4 al., 2017). For this analysis, we pooled the individual trials across all participants, sorted the  
5 trials by target SOA and grouped them into hundred 10-ms bins, from 0.2 to 1.2 s post noise  
6 onset. For each bin, we computed  $d'$  (Eq. 1) and  $c$  (Eq. 2) and fitted sine curves of different  
7 frequencies to the temporal sequences of  $d'$  and  $c$ .

8 We first considered the data as a whole (without dividing the trials contingent on the  
9 preceding stimuli) and searched for significant modulations within the range of 4-12 Hz in  
10 0.1-Hz steps. This frequency range encompasses the theta and alpha band. Figures 3 A&B  
11 show the binned aggregate data as a function of target SOA from noise onset, expressed as  
12 both sensitivity (Fig. 3A) and criterion (Fig. 3B). The shaded yellow and green areas  
13 enveloping the lines represent  $\pm 1$  standard error ( $N = 14$ ) of the group mean (SEM),  
14 computed by bootstrapping the individual trials 2,000 times and applying the same curve  
15 fitting analysis to the surrogate data. It is evident that while sensitivity shows no clear  
16 oscillation, the criterion does oscillate around the frequency of 9.4 Hz, as indicated by the  
17 grey curve in Fig. 3B. For comparison, we fitted a sinusoidal with the same frequency, 9.4 Hz  
18 (grey curve in Fig. 3A) to the sensitivity data.

19 We evaluated the goodness of each harmonic fit (4-12 Hz) using  $R^2$  combined with a  
20 permutation procedure, which involved shuffling the individual responses 2,000 times and  
21 applying the same curve fitting analysis to the surrogate data. From the surrogate data, we  
22 constructed a distribution of *maximal*  $R^2$  (across all tested frequencies) for sensitivity (Fig.  
23 3D) and criterion (Fig. 3E), against which we compared the  $R^2$  of the original data. The  
24 results are summarised in Fig. 3C. For sensitivity (orange line), no frequency produced a  
25 good fit, none near the corrected 95% confidence threshold of  $R^2 = 0.12$  (dotted black line).

1 However, the criterion data (green line) showed significant modulations between 9.2 and 9.6  
 2 Hz, with a strong peak at 9.4 Hz ( $R^2 = 0.15$ ). The significance test (illustrated in Fig. 3D&E)  
 3 confirmed that this frequency, 9.4 Hz, was significant for criterion,  $p = 0.009$  (Fig. 3D), but  
 4 not sensitivity,  $p = 0.9$  (Fig. 3D). The phase of the 9.4 Hz oscillation at trial onset relative to  
 5 the noise burst onset was  $179^\circ \pm 16^\circ$  SD (by bootstrap).  
 6

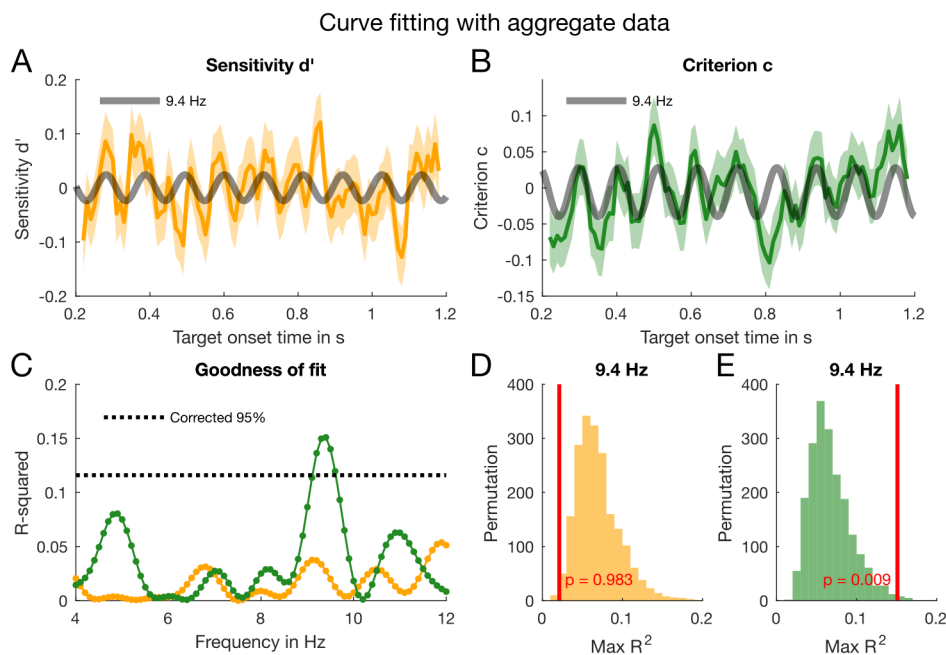

7  
 8 **Figure 3.** Results of the curve fitting analysis. **(A)** The yellow line shows the time course of  
 9 the detrended sensitivity ( $d'$ ) based on the aggregate data (by pooling all trials across the 14  
 10 participants and binned with a rectangular smoothing window of 20 ms moved every 10 ms).  
 11 For display, we smoothed the data but conducted all statistical analyses on the non-smoothed  
 12 data. The shaded area around the yellow line represents  $\pm 1$  SD of the bootstrapped data. The  
 13 black curve depicts a 9.4 Hz oscillation fitted to the sensitivity data. **(B)** The analysis of the  
 14 criterion ( $c$ ) data (green line) followed the same binning and curve fitting procedure. The 9.4  
 15 Hz oscillation (black curve) fits the criterion better than the sensitivity data. **(C)** The  
 16 goodness of the harmonic fit  $R^2$  obtained by the procedure illustrated in A&B. The  $R^2$  for the  
 17 criterion (green line) is highest round 9.4 Hz, while it is low and constant for sensitivity  
 18 (yellow line). The dotted black line represents the 95 percentiles of the permutation  
 19 distribution depicted in E. **(D-E)** To obtain a significance evaluation of the goodness of the  
 20 fit, we shuffled the aggregate data 2,000 times. After each shuffle, we fitted the data and  
 21 extracted the maximal  $R^2$  between 4-12 Hz illustrated in the yellow (sensitivity, D) and green  
 22 distributions (criterion, E). The red lines indicate the  $R^2$  yielded by the fit the original data at  
 23 9.4 Hz. The  $p$ -values reflect the proportion of permuted  $R^2$  that is equal or greater than the  
 24 original  $R^2$  (red line) across all tested frequencies.

1           The results shown in Fig. 3 were based on an aggregate data analysis (i.e., by pooling  
2 all trials across subjects). In principle, the criterion oscillation in Fig. 3B could derive from a  
3 few subjects with very strong oscillatory effects. To verify that this is not the case, we  
4 examined the individual data and evaluated their coherence as a group using the *linear*  
5 *regression analysis* in Eq. 5 (illustrated in Fig. 1C). As detailed in the Methods, this approach  
6 does not require data binning. We applied the regression analysis to the individual *accuracy*  
7 (correct or incorrect) and *response* data ('left' or 'right').

8           The results, summarised in Fig. 4, corroborate those of the aggregate data analysis.  
9 Figure 4A plots the amplitude spectrum for *accuracy* (an approximation of sensitivity) and  
10 Fig. 4B that for *response bias* (an approximation of criterion), which were computed using  
11 the individual estimates of the *fixed-effect regression parameters*,  $\beta_1$  and  $\beta_2$ , and their  
12 vectorial mean (Eq. 6). The shaded yellow and green areas enveloping the lines represent  $\pm 1$   
13 SEM. Response bias (Fig. 4B) shows a strong peak around the same frequency, 9.4 Hz, as the  
14  $R^2$  results for criterion in Fig. 3C. Using a similar permutation procedure as in the aggregate  
15 analysis, we evaluated the significance of each frequency between 4-12 Hz in 0.1-Hz steps.  
16 The corrected  $p$ -values are plotted in Fig. 4D&E for accuracy and response bias, respectively.  
17 The results for response bias shows that the oscillation at 9.4 Hz is significant ( $p = 0.027$ )  
18 after correction for multiple comparisons with maximal statistics (illustrated in Fig. 4F). The  
19 amplitude at 9.4 Hz is  $A = 0.02 \pm 0.01$  SEM. While there are several peaks in the amplitude  
20 spectrum for accuracy (Fig. 4A), none was significant after multiple comparison correction  
21 (Fig. 4D).

22           Figure 4F illustrates how the  $p$ -values were computed and corrected. The green dots  
23 (2,000 in total) clustering in a ring around the origin (0, 0) represent the joined distribution of  
24 *maximal*  $B_1$  and  $B_2$  (group averages of the individual  $\beta_1$  and  $\beta_2$ ) obtained by permutation. To  
25 construct this distribution, we determined the maximal vector of each randomisation,

1 *irrespective of the frequency*. The red dot shows the group mean estimated from the original  
 2 data at the peak frequency, 9.4 Hz. The red circle has a radius equal to the distance of the red  
 3 dot ( $B_1, B_2$ ) to the origin (0, 0). The  $p$ -value reflects the proportion of permuted data  
 4 exceeding the original data (the green points that fall outside the circle).

5 Finally, Fig. 4C shows the individual phase and amplitude vectors for response bias at  
 6 9.4 Hz. The length of the vectors reflects the amplitude of the 9.4 Hz oscillation and the  
 7 vector direction indicate individual phases at noise onset. The vectors are tightly clustered  
 8 around a phase angle,  $\theta$ , of  $172^\circ \pm 16^\circ$  SEM (Eq. 7). This is consistent with the phase angle  
 9 we obtained from the curve fitting analysis with the aggregate data (see above).

10

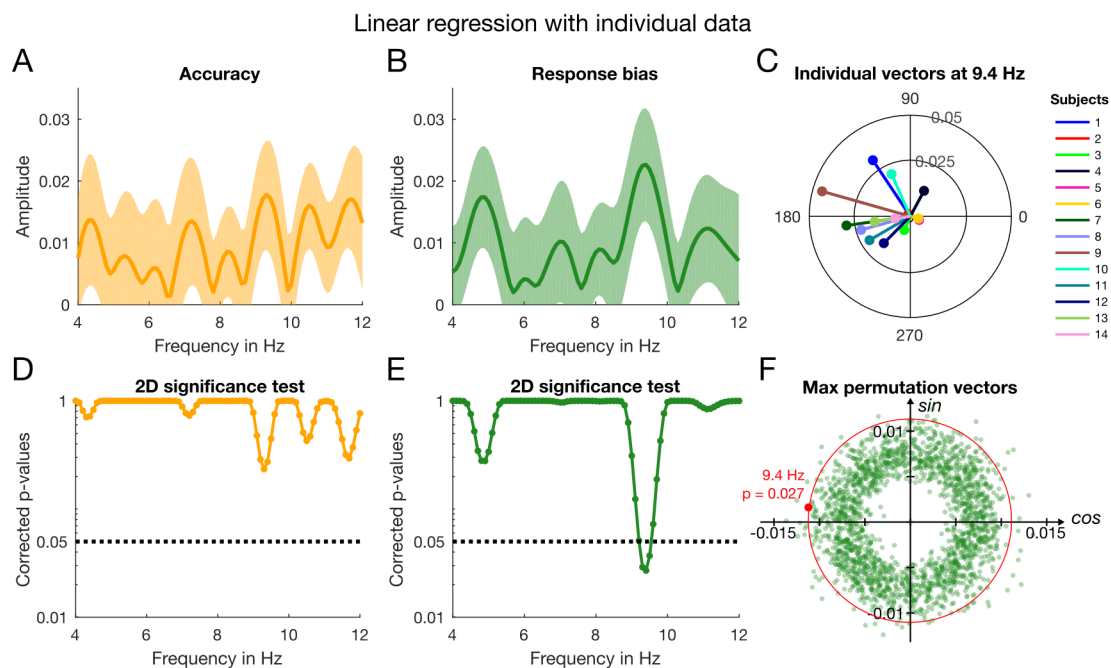

11

12 **Figure 4.** Results of the linear regression analysis based on individual data and single trials.  
 13 (A) The yellow line represents the amplitude spectrum for accuracy computed from the  
 14 vectorial average of the individual estimates of  $\beta_1$  and  $\beta_2$  (see Eq. 7). The shaded area around  
 15 the line indicates  $\pm 1$  SEM. (B) Amplitude spectrum of response bias based on the same  
 16 analyses as for accuracy. (C) Individual 2D vectors ( $\beta_1, \beta_2$ ) at 9.4 Hz for response bias. The  
 17 length of the line indicates the amplitude and the direction of the line the phase at noise onset  
 18 (i.e., phase reset). (D) The results of the 2D permutation test for accuracy for the frequency  
 19 range of interest, 4-12 Hz. We corrected for multiple comparisons using maximal statistics  
 20 illustrated in F. (E) Corrected  $p$ -values for response bias obtained by the same 2D

1 permutation as for accuracy. The dotted black line indicates  $\alpha = 0.05$ . (F) Illustration of the  
2 2D permutation test by which the  $p$ -values in D&E were computed. They reflect the  
3 proportion of maximal permutation vectors that exceed the group mean (red dot), i.e., the  
4 green points that fall outside the red circle.  
5

### 6 ***Oscillation in response bias is driven by stimulus history***

7 Having established the existence of rhythmic fluctuations in bias and criterion in both the  
8 aggregate and individual data, we investigated how the oscillations relate to serial effects  
9 driven by expectations from stimuli of previous trials using two different analysis. In the first  
10 analysis, we separated the trials based on whether the previous stimulus had been presented  
11 to the same ear (congruent) or a different ear (incongruent), and tested both sets of data for  
12 oscillations in both sensitivity and bias, using the same curve fitting and linear regression  
13 analyses as above. As predicted, the oscillation observed in criterion (Figs. 3&4) was driven  
14 by the preceding stimulus history, occurring only when the previous stimulus was *congruent*  
15 with the current stimulus.

16 Figure 5 shows the results of the analysis of the aggregate data. As before, we fitted  
17 the temporal sequences of sensitivity ( $d'$ ) and criterion ( $c$ ) for congruent (Fig. 5A) and  
18 incongruent trials (Fig. 5C) with sinusoids ranging in frequency between 4-12 Hz in 0.1 Hz  
19 steps. Congruent trials (dark green line), but not incongruent trials (light green line), showed  
20 a good fit at 9.4 Hz (thick grey line). The goodness of fit at all tested frequencies are plotted  
21 in Fig. 5D. The largest  $R^2$  was obtained around 9.4 Hz for congruent trials, with  $R^2 = 0.15$ ,  
22 while for incongruent trials, the goodness of fit did not approach significance at any  
23 frequency. As in the previous analysis, we created a distribution of maximal  $R^2$  (Fig. 5D)  
24 from the 2,000 surrogate datasets obtained by permutation and determined the 95 percentile  
25 for both congruent (Fig. 5D) and incongruent (Fig. 5E) trials. Any frequency with  $R^2$   
26 exceeding this threshold ( $R^2 = 0.12$ , dotted black line in Fig. 5B), was considered significant.  
27 Only the peak (green line, congruent trials) around 9.4 Hz survived the multiple comparison

1 correction, with  $p = 0.01$ . The phase of this 9.4-Hz oscillation for congruent trials was, at  
 2 noise onset,  $180^\circ \pm 17^\circ$  SD (by bootstrap). For incongruent trials, the phase at 9.4 Hz was  
 3  $179^\circ \pm 34^\circ$  SD.  
 4

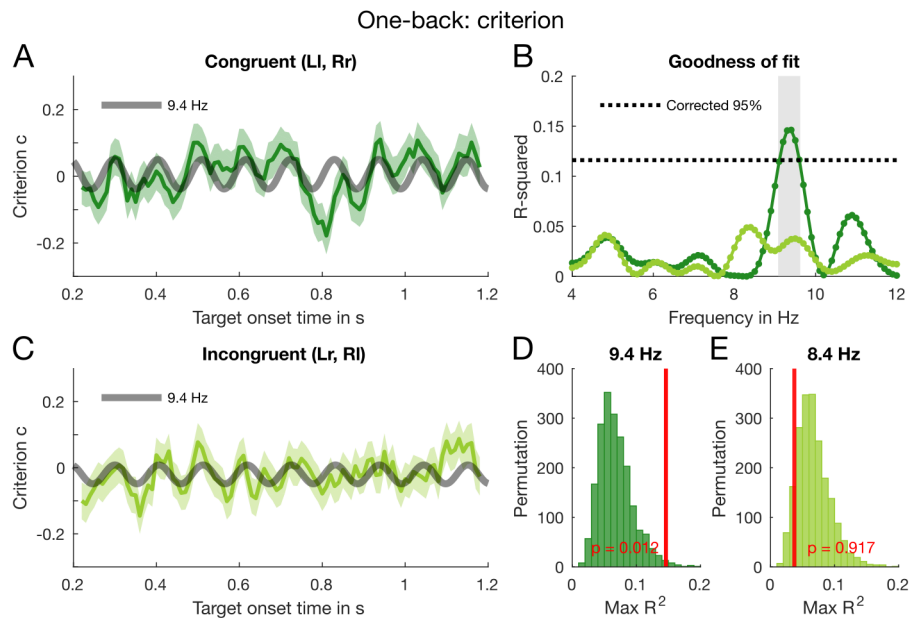

5  
 6 **Figure 5.** Results of the one-back analysis for criterion with aggregate data. (A) The dark  
 7 green line shows the binned *congruent* trials. For display, we smoothed the data but  
 8 conducted all statistical analyses on the non-smoothed data. The error bars indicate  $\pm 1$  SD  
 9 obtained by bootstrapping the aggregate data 2,000 times. The thick grey line represents the  
 10 9.4-Hz oscillation which we fitted to the criterion data. The *incongruent* trials were submitted  
 11 to the same binning, curve fitting and bootstrapping procedure; the results are summarised in  
 12 panel (B). (C) The goodness of fit for congruent (dark green line) and incongruent trials  
 13 (light green line) at all tested frequencies from 4-12 Hz in 0.1-Hz steps. The black dotted line  
 14 indicates the 95 percentiles of the distribution of maximal  $R^2$  obtained by permuting the  
 15 individual trials. (D) Distribution of maximal  $R^2$  for congruent trials. The vertical red line  
 16 indicates the  $R^2$  of the original data and the  $p$ -value reflects the proportion of maximal  $R^2$   
 17 greater or equal the  $R^2$  of the original data. (E) Distribution of maximal  $R^2$  for incongruent  
 18 trials, calculated as in panel (D).  
 19

20 As before, we examined the individual subject data using the linear model in Eq. 5,  
 21 separately for congruent and incongruent trials. The amplitude spectra in Fig. 6A and 6D are  
 22 based on the individual estimates of  $\beta_1$  and  $\beta_2$  averaged across the 14 participants (see Eq. 7).  
 23 As for the aggregate data, the congruent trials (dark green line) yielded a large peak around



1 9.4 Hz with  $A = 0.03 \pm 0.009$  SEM (Fig. 6A). At this frequency, the amplitude is reduced for  
2 the incongruent amplitude spectrum with  $A = 0.02 \pm 0.01$  SEM (Fig. 6D). Inspection of the  
3 individual vectors shows a tight cluster around a mean phase angle (at noise onset) of  $164^\circ \pm$   
4  $13^\circ$  SEM for congruent trials (Fig. 6B), while incongruent trials had a slightly greater phase  
5 dispersion, with a mean phase angle (at noise onset) of  $177^\circ \pm 18^\circ$  SEM (Fig. 6E).

6 The results of the 2D permutation test plotted in Fig. 6G corroborate the observations  
7 in Figs. 5A&D. The only frequencies to survive the strict multiple comparison correction  
8 were around 9.4 Hz (dark green line, congruent trials) with  $p = 0.045$ . In contrast,  
9 incongruent trials showed no significant frequencies (light green line). The 2D permutation  
10 distributions for congruent and incongruent trials at 9.4 Hz are plotted in Fig. 6C and 6F,  
11 respectively. The thick red dot shows the amplitude and phase of the group mean with respect  
12 to the permutation distribution. Only in the congruent case does the group mean exceed the  
13 distribution of maximal vectors significantly (Fig. 6C).

14 We also analysed the sensitivity for congruent and incongruent trials, but failed to  
15 find significant oscillations in either data set (data not shown). The lack of modulation in  
16 sensitivity in the present study is consistent with our previous findings that sensitivity  
17 oscillates in antiphase between the left and right ears (Ho et al., 2017): because they are out  
18 of phase, they should cancel each other under the conditions of this study, where results for  
19 left and right ears need to be combined for the sensitivity analysis. We checked this  
20 hypothesis by a post-hoc regression analysis of the accuracy of congruent trials separated by  
21 ear of origin. We first examined the phase coherence across subjects at all frequencies of  
22 interest (4-12 Hz) for each ear and congruence condition separately. Observers showed  
23 significant phase consistencies for *both* ears for the *congruent* trials at only one region in the  
24 frequency spectrum, from 9.1 to 9.7 Hz (consistent with the grey shaded region of  
25 significance in Fig. 6B). At no frequency was there strong phase coherence in the

1 incongruent trials. Using the Watson-Williams test (circular analogue to a two-sample  $t$ -test;  
 2 Berens, 2009), we confirmed that the group phase distributions for left- and right-ear  
 3 accuracy in the congruent trials were significantly different ( $p < 0.05$ , Bonferroni corrected)  
 4 between 9.1 and 9.7 Hz, peaking at around 9.4 Hz. Figure 6H shows the individual vectors at  
 5 9.4 Hz for congruent trials containing a left target with a mean direction (thick red line) of  
 6  $\sim 189^\circ \pm 12^\circ$  SEM. For congruent trials containing a right target, the individual vectors show  
 7 a mean direction of  $\sim 304^\circ \pm 14^\circ$  SEM at 9.4 Hz (Fig. 6I). Although the relationship between  
 8 the left and right accuracy on congruent trials is not exactly antiphase ( $\sim 115^\circ$ ), they do show  
 9 a trend in this direction. This suggests that the absence of sensitivity oscillations (Figs. 2&3)  
 10 in the present study is likely due to a cancellation of left and right ear oscillations.  
 11

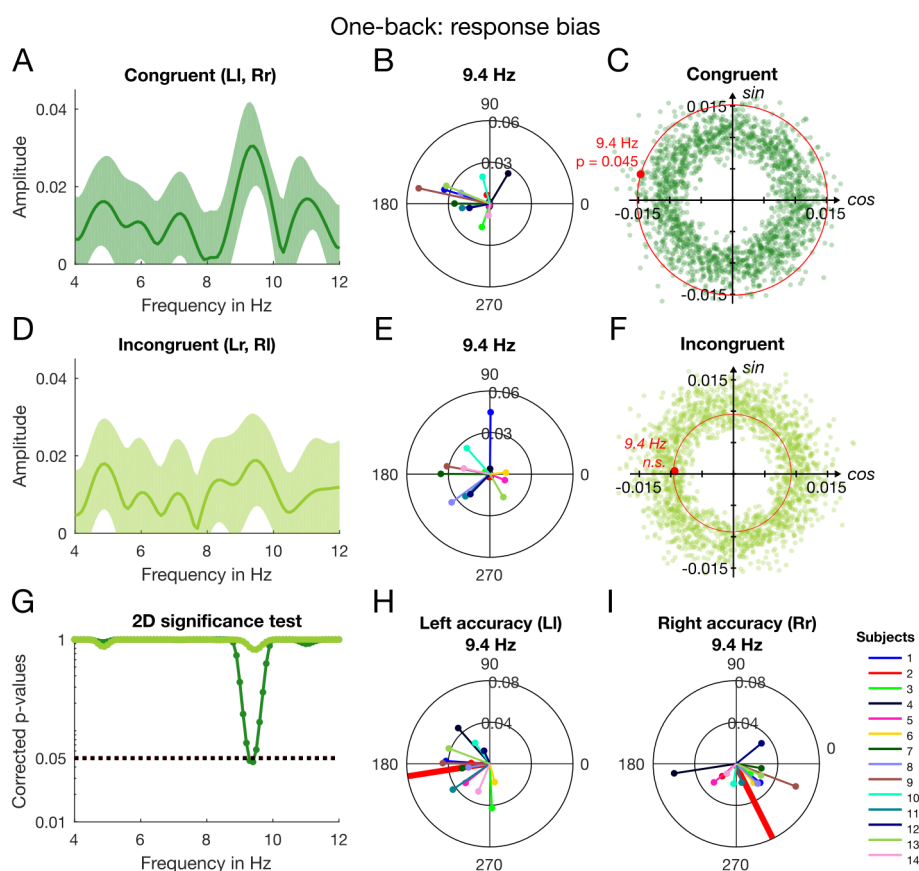

12  
 13 **Figure 6.** Results of the one-back analysis for response bias with individual subject data. **(A)**  
 14 Amplitude spectrum for the congruent trials computed based on the individual estimates of  $\beta_1$   
 15 and  $\beta_2$  averaged across participants. The shaded area around the dark green line indicates  $\pm 1$

1 SEM. By the same method, we computed the amplitude spectrum with incongruent trials; the  
2 results can be inspected in panel **(D)**. **(B)** Individual phase and amplitude vectors (at noise  
3 onset, i.e., phase reset) based on congruent trials at 9.4 Hz. The subjects are coded with the  
4 same colours as in Fig. 4C. The individual vectors for incongruent trials at 9.4 Hz are shown  
5 in **(E)**. **(C)** The joined distribution of maximal vectors for congruent trials. The  $p$ -value  
6 reflects the proportion of vectors that exceed the group mean (red dot); in practice, that is the  
7 number of green points falling outside the red circle. The joined distribution of maximal  
8 vectors for incongruent trials is shown in **(F)**. **(G)** The computations in (C&F) were done for  
9 every tested frequency between 4-12 Hz in 0.1-Hz steps. The dark and light green lines depict  
10 the corrected  $p$ -values for congruent and incongruent trials, respectively. The black dotted  
11 line indicates  $\alpha = 0.05$  (corrected for multiple comparisons). **(H)** As a post-hoc test, we split  
12 the congruent trials further into trials that contained a left target and trials that contained a  
13 right target and tested their phase relationship using circular statistics. At 9.4 Hz observers  
14 showed very strong phase coherence for both ears. Here, we plot the individual phase and  
15 amplitude vectors for congruent trials containing a target in the left ear. The thick red line  
16 indicates the direction of the mean vector (with unit length) which is close to  $180^\circ$ . **(I)** The  
17 individual phase and amplitude vectors at 9.4 Hz for congruent trials containing a right target.  
18 The direction of the mean vector is  $\sim 300^\circ$ .  
19

20 As the serial dependence analysis showed strong 2-back effects (Fig. 2B), we  
21 hypothesised that the 9-Hz oscillation could be long-lasting, spanning at least two trials,  
22 which is also suggested by recent findings (Chang et al., 2017). To investigate whether events  
23 two trials back show measurable oscillations near 9.4 Hz, we separated the *1-back*  
24 *incongruent data* (which show no significant oscillations in Fig. 5C) further on the basis of  
25 whether the stimulus two trials back was congruent or incongruent. Given that the *1-back*  
26 *incongruent data* showed no oscillation in previous analyses, any memory trace should be  
27 relatively weak and confined to a very narrow frequency window 0.5 Hz wide, 9.1-9.6 Hz,  
28 the frequency range where the congruent 1-back data showed a significant oscillation (after  
29 correction for multiple comparison; grey shaded box in Fig. 6B). We used the same analysis  
30 as before, but instead of testing every frequency from 4-12 Hz, we allowed the curve-fitting  
31 algorithm to search for the best frequency within our limited window of interest (9.1-9.6 Hz)  
32 for both the original and shuffled data. The results, shown in Fig. 7 confirm a 9-Hz oscillation  
33 in the 2-back congruent data which was best fitted by a sinusoidal with frequency of  $\sim 9.2$  Hz,

1  $R^2 = 0.08$ . The permutation test confirmed that this fit is significant (Fig. 7B),  $p = 0.037$  when  
2 compared with the best fits of shuffled data within the frequency of interest, 9.1-9.6 Hz.  
3 There was no modulation near this frequency in the 2-back incongruent data (Figs 2E&F):  $R^2$   
4  $= 0.02$ , with  $p = 0.7$  (Fig. 7D). No other frequency within the range of 4-12 Hz approached  
5 significance, after multiple comparison correction.

6 To examine the individual data and group coherence at 9.2 Hz, we applied the same  
7 regression analysis as before (Eq. 5). Figure 7C shows the individual vectors at 9.2 Hz based  
8 on the 2-back congruent trials and Fig. 7G the individual vectors based on the incongruent  
9 trials. The individual phases in the congruent condition cluster around a similar phase,  $190^\circ \pm$   
10  $18^\circ$ , similar to that of the 1-back congruent data (Fig. 6B). The mean phase angle in the  
11 incongruent condition is  $295^\circ \pm 15^\circ$  and bears no relation to either the mean phase in the 1-  
12 back congruent or incongruent condition (Figs. 6B&E). Figures 7D&H show the results of  
13 the 2D permutation test at 9.2 Hz, which are consistent with the results of the aggregate data  
14 analysis. Very few points (dark cyan dots in Fig. 7D) from the permutation distribution  
15 ( $p = 0.013$ ) exceed the group mean vector (thick red dot) in the congruent condition, while  
16 many more points exceed the mean vector in the incongruent condition,  $p = 0.36$  (Fig. 7H).  
17 Taken together, the results suggest that the 9-Hz oscillation lasts at least two trials. Although  
18 the reverberation is weaker 2-back than 1-back, as to be expected, it may be sufficient to  
19 induce the long-lasting serial dependence observed on average (Fig. 2).

20

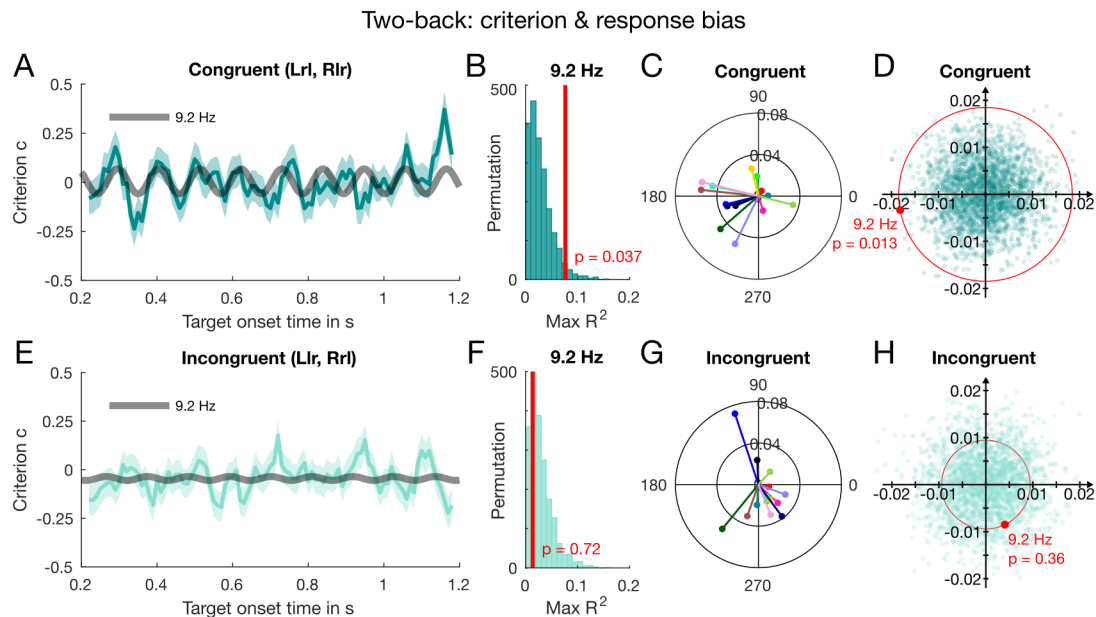

1  
2 **Figure 7.** Results of the two-back analysis for criterion with aggregate data. For this analysis,  
3 we separated the *incongruent* data from the 1-back analysis (Figs. 5&6) further into  
4 congruent and incongruent 2-back. **(A)** The dark cyan line shows the binned *congruent* trials.  
5 As in Fig. 4, we smoothed the data for display but conducted all statistical analyses on the  
6 non-smoothed data. The error bars indicate  $\pm 1$  SD obtained by bootstrap ( $n = 2,000$ ). The  
7 dark grey thick line represents the best fitting sinusoid which for the *congruent trials* was at  
8 9.2 Hz (the frequency was free to vary between 9.1 and 9.6 Hz). The binned incongruent data  
9 is shown in (E), fitted with the same frequency, 9.2 Hz. No other frequency in the 9.1-9.6 Hz  
10 range fitted better. **(B)** The  $R^2$  obtained at 9.2 Hz (thick red line) was compared against the  
11 goodness-of-fit of the shuffled data (dark cyan histogram), binned and fitted as the original  
12 data. The test confirmed that the 9.2-Hz oscillation in the congruent data was significant. As  
13 shown in (F), the same test for the incongruent condition was not significant. **(C)** The  
14 individual vectors in the congruent condition at 9.2 Hz. The subjects are colour-coded as in  
15 Figs. 4&6. Their phases cluster around a similar phase as in the congruent 1-back (Fig. 6B).  
16 In contrast, (F) shows the incongruent phase cluster at 9.2 Hz and their mean phase bears no  
17 relation to either the congruent or incongruent mean phase in the 1-back (Figs. 6B&D). **(D)**  
18 The result of the 2D permutation test for the congruent condition, which is consistent with the  
19 result of the aggregate data analysis shown in (B). The 2D permutation result for the  
20 incongruent condition is shown in (H) and also consistent with the result in (F).

21

22

## 1 **Discussion**

2

3 To maintain a stable and coherent percept in a world that is naturally noisy and ambiguous,  
4 observers take advantage of past information to anticipate forthcoming sensory input. While  
5 there is a good deal of behavioural evidence in favour of this predictive account of  
6 perception, little is known about the underlying neural mechanisms. Here, we present  
7 evidence suggesting that predictive perception is implemented rhythmically through alpha-  
8 band oscillations, along the lines of the “perceptual echo” suggested by VanRullen and  
9 Macdonald (2012).

10 Our current study shows that identifying the ear of origin of a weak tone was strongly  
11 biased by previous stimuli, two or even three trials before the current trial. Although the  
12 immediately previous trial had no average serial effect, we observed a strong rhythmic  
13 fluctuation in bias (measured by *criterion*) at ~9.4 Hz, which was critically dependent on  
14 stimulus history: strong oscillations occurred only when the previous target had been  
15 presented to the same ear as the current one, and weaker oscillations could be elicited by  
16 stimuli in the same ear two trials previously. The results reinforce our previous study (Ho et  
17 al., 2017) showing oscillations in *criterion* (for a different task) at similar frequencies (around  
18 7.5 and 8.7 Hz), and extend these in an important way by showing that the oscillations are  
19 contingent on past stimulus history.

20 Why do oscillations occur only when the previous trial was presented to the same ear  
21 as the current one? One possible mechanism, illustrated in Fig. 8, is based on the “perceptual  
22 echo”, as suggested by VanRullen and Macdonald (2012; see also Bowen, 1989). An  
23 auditory signal presented to one ear should elicit a neural reverberatory response that  
24 oscillates in the alpha range, and affects subsequent perceptual decisions. Our data further  
25 suggest that the perceptual echo is confined to the ear in which it is evoked. We assume that

1 the phase of this oscillation becomes aligned to the onset of the noise-burst of the following  
2 trial (dotted vertical black lines in Fig. 8), and that the alignment phase is opposite for each  
3 ear ( $180^\circ$  for the left and  $0^\circ$  for the right ear). This echo could then bias the response to  
4 subsequent signals presented to the same ear, either by modulating the neural gain of the  
5 signals (Rahnev et al., 2011), or by causing a shift in the decision boundary.

6 To illustrate, Fig. 8 shows putative internal representations of noise and signal.  
7 Presentation of a stimulus may set up an internal “echo” at about 9 Hz, confined to that ear.  
8 The onset of the noise burst resets the phase of the echo, to about  $180^\circ$  in the left ear (Fig.  
9 8A) and  $0^\circ$  in the right ear (Fig. 8B). If we assume that the echo modulates gain, then the  
10 amplitude of the response to stimuli presented to the same ear will depend on time of  
11 presentation, more amplified if presented at a peak than at a trough. This modulation will be  
12 reflected in response bias, but not average sensitivity, as the echoes in the two ears are  
13 assumed to be out of phase (discussed below). The new stimulus will in turn elicit a new echo  
14 in that ear (red trace), which reverberates to the next trial.

15

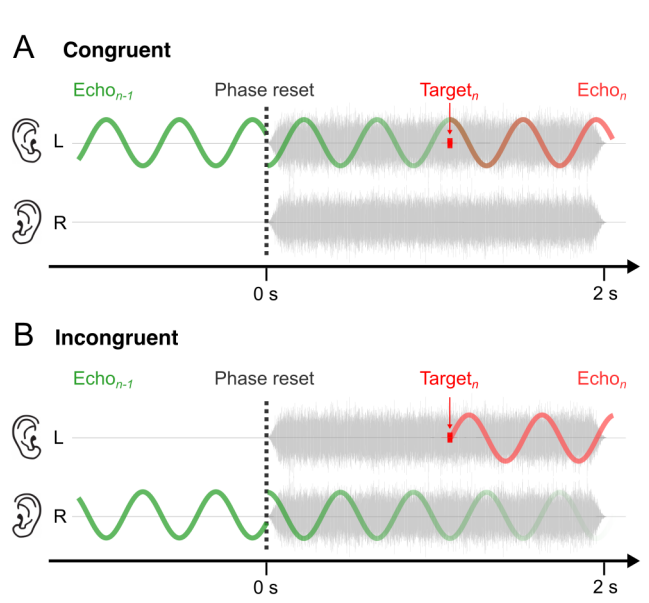

16

17 **Figure 8.** Possible mechanisms by which past sensory experience biases forthcoming  
18 perceptual decisions, causing oscillations in congruent but not incongruent trials. (A) The  
19 green oscillation represents the ‘echo’ evoked by a target in the left ear in the previous trial  
20 ( $n-1$ ). The reverberation resonates at alpha rhythm and continues to the current trial ( $n$ ) where

1 it synchronises with other ongoing brain oscillations (possibly related to perceptual and  
2 decisional processes) by the noise onset. In this example, the current target is *congruent* with  
3 the preceding target, i.e., both occur in the left ear. Because the echo is ear specific, it will  
4 bias the observer's decision towards a "left response" when the stimulus is presented in the  
5 excitatory period of the echo and toward a "right response" in the negative periods. **(B)** Here,  
6 the target is *incongruent* with the preceding target, i.e., it occurs in the opposite ear. In this  
7 case, the echo has no influence on the observer's decision. In both scenarios, the target of the  
8 current trial will elicit a new echo (red oscillation) that reverberates into the next trial.  
9  
10

11           How could cyclic increases in sensitivity or gain result in changes in *criterion* but not  
12 in *d'*? As the sequence of stimuli was completely random, past information was not  
13 informative about the current trial, and therefore could not increase *d'*, either on average or in  
14 a cyclical manner; but it can change the trial-by-trial judgment of which ear carried the weak  
15 signal. It is important to point out that *criterion* changes do not necessarily reflect decision  
16 processes (such as shifts in decision boundaries), but can also reflect perceptual changes  
17 (Peters et al., 2016; Witt et al., 2015). In the current experimental design, calculations of *d'*  
18 can only be made after combination of hits and false alarms to stimuli presented to the two  
19 ears. If the modulation of activity in the two ears is in counterphase, they will cancel each  
20 other out when the output is combined for *d'*, but add together for *criterion*. Evidence from  
21 our previous (Ho et al., 2017) and present study (of Figs. 6H&I) suggests that this does occur:  
22 when the congruent data are separated for ear of origin of the signal, the oscillations in the  
23 left ear tend to be out of phase with those of the right (~115° on average in this study).

24           Why did our experiments reveal no positive serial dependence on the immediately  
25 previous trial (1-back), as is normally observed in studies of serial dependence? There are (at  
26 least) two possible, non-mutually exclusive explanations. The first is a consequence of the  
27 forced-choice paradigm used here (while most studies of serial dependence use a  
28 reproduction technique). Forced-choice paradigms can lead to sequential response biases  
29 independent of the stimuli, such as alternation of responses (Abrahamyan et al., 2016),  
30 especially after a long run of similar responses (probably related to the gambler's fallacy



1 (Burns and Corpus, 2004; Tversky and Kahneman, 1971). As the responses were strongly  
2 correlated with stimuli (75% correct), a systematic alternation would tend to cancel out  
3 positive serial dependence based on the previous stimulus (but have no effect on average for  
4 trials two-back). Not all observers alternate: some show the opposite tendency, “sticking”  
5 with the current response. Figure 2C is consistent with this idea: while only one observer  
6 showed negative serial dependence for 2-back trials, the variability in 1-back trials was much  
7 higher: five out of 14 observers showed positive 1-back biases, showing a tendency for  
8 “sticking”, while the others could be switchers. Further evidence comes from the response-  
9 based analysis, which showed a strong negative serial dependency, meaning that responses  
10 tended to be *different* from the previous one (independent of the stimuli). As stimuli and  
11 responses were highly correlated, this response-dependent bias will also impact the  
12 dependence on previous stimuli, potentially cancelling any positive serial dependence that  
13 may have been present.

14 Another possible reason for the lack of positive 1-back effects is that the stimuli may  
15 have caused both positive serial dependence and negative adaptation aftereffects. As  
16 mentioned in the introduction, both types of effects have been reported in sequential  
17 judgments, sometimes within the same experiment (Abrahamyan et al., 2016; Chopin and  
18 Mamassian, 2012; Taubert et al., 2016). Negative aftereffects tend to be shorter lived than the  
19 positive dependencies, and should therefore affect only 1-back, not 2-back trials (Chopin and  
20 Mamassian, 2012). This seems to be less plausible given the strong dependence on response  
21 (while aftereffects are stimulus-driven), but we cannot rule out the possibility.

22 Whatever the reason for the lack of positive serial dependence in the averaged results,  
23 our study suggests that oscillations may be a more sensitive signature of memory-based  
24 perceptual effects than simply looking at average results. Many competing effects could

1 reduce or annul average serial dependence effects, without affecting rhythmic, time-  
2 dependent oscillations.

3 As both vision and audition have similar serial dependencies and oscillations of  
4 decision criteria at alpha rhythm, the mechanism described in Fig. 8 may generalise to other  
5 sensory modalities. However, considering the anatomical and organisational differences  
6 between the visual and auditory system, it is possible that this mechanism had to be adapted  
7 to the specific architecture of each sense. For instance, oscillatory effects that are robust in  
8 vision are not readily observed in audition (VanRullen et al., 2014; Zoefel et al., 2015; Zoefel  
9 and Heil, 2013; Zoefel and VanRullen, 2017). However, by using *dichotic* rather than *diotic*  
10 stimulation (as all previous studies had done) we were able to show that similar to visual  
11 sensitivity, auditory sensitivity also oscillates but in antiphase for the two ears (Ho et al.,  
12 2017). As a result, when we summed the ears (as would be the case in diotic stimulations),  
13 the sensitivity oscillations cancelled each other out. Our findings therefore show that the ears  
14 need to be stimulated separately in order to observe certain oscillatory effects.

15 In summary, we showed that when participants were asked to determine the ear of  
16 origin of a brief sinusoidal target masked by white noise, their decision criteria oscillated at  
17 an alpha rhythm. Further analyses revealed that the alpha oscillation in criteria was driven  
18 entirely by trials in which the target occurred in the same ear as that of the immediately  
19 preceding trial. When the previous and current targets occurred in opposite ears, we found no  
20 observable oscillations of criteria. To account for these findings, we proposed that every  
21 target elicits a long-lasting reverberation at alpha rhythm that is ear-specific and continues to  
22 the next trial, where it synchronises with other ongoing brain oscillations possibly related to  
23 both perceptual and decisional processes. Because this ‘echo’ is ear specific, it will only bias  
24 perceptual decisions (towards or away from the ear in which the echo was elicited), if the  
25 following target occurs in the same ear. The bias is not absolute but fluctuates over time, and

1 may become stronger as more evidence of the same stimuli occurs successively in the  
2 sequence. Although this model is very basic, we believe it could be elaborated to explain  
3 more complex serial dependence effects and provide a deeper understanding of how  
4 expectation or prediction guides perception.

5

## 6 **Materials and Methods**

7

### 8 *Participants*

9 Eighteen healthy participants took part in the experiment. All reported normal hearing. Four  
10 participants were male and two left-handed. After inspecting participants' auditory thresholds  
11 and (log-transformed) reaction times, we excluded four participants (one male) from the data  
12 analysis for the following reasons. Three exhibited large differences in mean auditory  
13 threshold between the left and right ear (1 standard deviation from the group mean) and one  
14 displayed an atypical distribution of very long reaction times (2.5 standard deviations from  
15 the group mean). The mean age of the remaining 14 participants was  $21.14 \pm 4.22$ . All  
16 participants provided written, informed consent. The study was approved by the Human  
17 Research Ethics Committees of the University of Sydney. No power analysis was used to  
18 decide the number of subjects or the number of trials per subject. We based our sample size  
19 estimations on our previous study (Ho et al., 2017), which showed oscillations in auditory  
20 perceptual performance before, and other studies on similar behavioural rhythms in vision  
21 (Fiebelkorn et al., 2013; Landau and Fries, 2012).

22

### 23 *Experimental procedure*

24 The experimental design was kept largely the same to our earlier study (Ho et al., 2017).  
25 However, instead of the bilateral tone discrimination task ( $2 \times 2$  design) used in our previous

1 experiment, we asked participants to determine the *ear of origin* of a similarly brief  
2 sinusoidal tone of 10-ms duration and 1,000 Hz in frequency masked by dichotic white noise.

3         As in the previous experiment, participants sat in a dark room and listened to auditory  
4 stimuli via in-ear tube-phones (ER-2, Etymotic Research, Elk Grove, Illinois). They wore  
5 earmuffs on top of the tube-phones (3M Peltor 30 dBA) to isolate external noise. The  
6 broadband white-noise masks were 2 s long and randomly generated each trial. To ensure that  
7 the noise masks were both clearly lateralised and uncorrelated, the left- and right-ear maskers  
8 were in antiphase (each a time-reversed duplicate of the other). As illustrated in Fig. 1A, the  
9 noise segments were presented to both ears with simultaneous onset. The target tone was  
10 delivered randomly with equal probability in either ear during the 2-s noise masker with a  
11 stimulus-onset asynchrony (SOA) randomly drawn from an interval of 0.2–1.2 s post noise  
12 onset. Participants responded via button press on a response box (ResponsePixx, Vpixx  
13 Technologies, Saint-Bruno, Quebec). All participants used their thumbs to respond were  
14 instructed to respond as soon as possible while the noise masker was still present. For each  
15 ear, the target's intensity was kept around individuals' thresholds (75 % accuracy) using an  
16 accelerated stochastic approximation staircase procedure (Faes et al., 2007; García-Pérez,  
17 2011). The next trial started after a silent inter-trial interval (ITI) of random duration between  
18 1.2–2.2 s.

19         Participants completed 2,800 trials (40 blocks of 70 trials) in total. Blocks lasted ~5  
20 minutes and participants were allowed to rest after every block. Prior to the experiment, they  
21 completed a practice block of 20 trials with feedback but no feedback was provided during  
22 the experiment. Stimuli were presented using the software *PsychToolbox* (Brainard, 1997) in  
23 conjunction with *DataPixx* (Vpixx Technologies, Saint-Bruno, Quebec) in MATLAB  
24 (Mathworks, Natick, Massachusetts).

25

## 1 ***Signal detection theory***

2 Prior to the data analysis, trials in which the response occurred before the target onset or after  
3 the noise offset were excluded. Additionally, we eliminated trials with reaction time (RT)  
4 exceeding the 99 % confidence intervals of individuals' RT and with target intensity beyond  
5 the 95 % confidence intervals of individuals' thresholds.

6 We computed  $d'$  and  $c$  using Eq. 1 and 2 from *signal detection theory* (SDT) (Green  
7 and Swets, 1966; Macmillan and Creelman, 2004). As illustrated in Fig. 1B, the calculation  
8 of the hit rate ( $H_{right}$ ) was based on the hits from the right target condition and the false alarm  
9 rate ( $FA_{left}$ ) based on the false alarms from the left target condition.  $d'$  is given by the  
10 difference between z-transformed hit and false alarm rates:

$$11 \quad d' = \frac{z(H_{right}) - z(FA_{left})}{\sqrt{2}} \quad (1)$$

12 Half the sum of the z-transformed hit and false alarm rates gives  $c$ , the bias towards one of  
13 the responses (left ear when positive and right ear when negative).

$$14 \quad c = -0.5 \times \left( z(H_{right}) + z(FA_{left}) \right) \quad (2)$$

15

## 16 ***Behavioural oscillations***

17 *Aggregate data analysis.* To look for oscillations in sensitivity and response bias, we applied  
18 two different methods. The first is the same *curve fitting* approach we used in our previous  
19 study (Ho et al., 2017). For this analysis, we pooled across all 14 participants, sorted the trials  
20 by target SOA and grouped the data into hundred 10-ms bins, from 0.2 to 1.2 s post noise  
21 onset. The mean number of trials per bin was  $151 \pm 24$  for the left-target condition and  
22  $152 \pm 25$  for the right-target condition. For each bin, we computed  $d'$  and  $c$  as above (Eq.  
23 1&2). Using the standard MATLAB function *fit* included in the *Curve Fitting* toolbox, we

1 fitted the following Fourier series model (Eq. 3) to the resulting sequence of sensitivity and  
2 criterion (see Fig. 3A&B):

$$3 \quad f(t) = a_0 + a_1 \sin(\omega t) + b_1 \cos(\omega t) = A \cos(\omega t + \phi), \quad (3)$$

4 where  $t$  is time ( $t = 0.2, 0.3 \dots 1.2$  in seconds),  $\omega$  is the angular frequency ( $\omega = 2\pi f$ ) we want  
5 to test,  $a_0$  is a constant and  $a_1$  and  $b_1$  are the sine and cosine coefficients respectively.  $A$  and  $\phi$   
6 represent amplitude and phase of the sinusoidal fit. We used a non-linear least-squares  
7 method (a standard implementation in MATLAB) whereby the summed squares of the  
8 residuals were minimised through successive iterations (400 iterations in total). As in our  
9 previous study (Ho et al., 2017), sensitivity displayed a decreasing non-linear trend over time  
10 which we removed before curve fitting using the same polynomial fit (*polyfit* in MATLAB).  
11 Detrending was not applied to the criterion curve. For each frequency between 4 and 12 Hz  
12 (in 0.1 Hz steps), we fitted the best sinusoid, allowing amplitude and phase to vary (two  
13 degrees of freedom). This yielded a measure of goodness of fit,  $R^2$ , as a function of frequency  
14 (Fig. 3C). To test the significance of every fit, we applied a permutation procedure (Ernst,  
15 2004) whereby we shuffled the responses of each individual trial over all SOAs to generate  
16 2,000 surrogate datasets which we submitted to the same binning and curve fitting procedure  
17 as the original data. To correct for multiple comparisons, we determined the maximal  $R^2$  for  
18 every surrogate dataset irrespective of frequency. This resulted in a distribution of 2,000  
19 maximal  $R^2$  (Figs. 3D&E) against which we compared each fit to the original dataset. Any  
20 frequency that exceeded the 95 percentile of the maximal- $R^2$  distribution (dotted line in Fig.  
21 3C) was considered significant. We also estimated the variability in the aggregate data by  
22 applying the bootstrap method which involves the random selection of the same number of  
23 trials (with replacement) as in the original data and submitting the surrogate datasets to the  
24 same binning and curve fitting procedure as above.

1            *Individual and group analysis.* The curve fitting method described above requires a  
2 sufficient number of trials per time point to accurately estimate the oscillations underlying  $d'$   
3 and  $c$ . For that reason, we had to pool across all subjects and bin the aggregated data. In order  
4 to examine the individual data for oscillations and evaluate their coherence across subjects,  
5 we used a different approach which does not require data binning but allows for an estimation  
6 of participants' sensitivity and response bias based on single trials (for similar approaches,  
7 see (Benedetto et al., 2018; Tomassini et al., 2017). As illustrated in Fig. 1C, the response  $y_i$   
8 ( $i = 1, 2 \dots n$ , where  $n$  is the total number of trials) to a target presented at time  $t_i$  (i.e., the  
9 interval from noise onset to target onset in seconds) can be modelled as the linear  
10 combination of harmonics at each tested (angular) frequency (compare with Eq. 3):

$$11 \qquad \hat{Y}_n = \beta_0 + \beta_1 \sin(\omega t_n) + \beta_2 \cos(\omega t_n), \qquad (4)$$

12 where  $\hat{Y}_n$  is the predicted responses and  $\beta_0$ ,  $\beta_1$  and  $\beta_2$  are fixed-effect regression parameters  
13 that can be estimated using the *linear* least-squares method implemented in MATLAB as the  
14 *fitlm* function from the *Statistics and Machine Learning* toolbox. To retain some consistency  
15 between the individual data and aggregate data analyses, we analysed sensitivity and  
16 response bias separately, that is,  $y_i$  reflected either individual accuracy or response bias.  
17 Therefore, the model we used is a special case of the *general linear model* (GLM) as it is  
18 restricted to one dependent variable (also called *multiple linear regression*). This model  
19 estimates the regression parameters adequately when the sampling rate is uniform across the  
20 time series. As this condition may not always be met, we applied the *full model* which  
21 includes a third independent regressor containing information about the stimulus:

$$22 \qquad \hat{Y}_n = \beta_0 + \beta_1 \sin(\omega t_n) + \beta_2 \cos(\omega t_n) + \beta_3 S(t_n), \qquad (5)$$

23 where  $S$  is the stimulus at time  $t$  and takes the value  $-1$  or  $+1$  for left and right target  
24 respectively. We examined sensitivity based on participants' correct and incorrect responses

1 in which case  $y_i = 1$  for correct and  $y_i = 0$  for incorrect. To analyse response bias,  $y_i$  took the  
2 value 1 when participants made a ‘right’ response and 0 when they made a ‘left’ response.<sup>1</sup>  
3 To measure the group’s coherence in terms of both phase and amplitude at each frequency,  
4 we averaged the sine and cosine regression parameters across all participants, i.e.,  $B_1 =$   
5  $\frac{1}{n} \sum_i^n \beta_1$  and  $B_2 = \frac{1}{n} \sum_i^n \beta_2$ , where  $n = 15$  and  $i = 1, 2 \dots n$ , and obtained an amplitude  
6 spectrum (Figs. 4A&B) by taking the vectorial average of the individual estimates given by  
7 the square root of their sum squared for every frequency:

$$8 \quad A = \sqrt{B_1^2 + B_2^2} \quad (6)$$

9 We computed the mean phase  $\theta$  by taking the arctangent of the ratio of the averaged sine to  
10 cosine regression parameter:

$$11 \quad \theta = \tan^{-1} \frac{B_1}{B_2} \quad (7)$$

12 The significance of the model fit in Eq. 5 was evaluated using a two-dimensional (2D)  
13 permutation test. Specifically, we tested the null hypothesis that the individual response data  
14 contain no temporal structure and thus their time stamps should be interchangeable. To this  
15 end, we shuffled the SOAs (i.e., the interval between noise onset and target presentation),  
16 keeping the relationship between the response (‘left’ response or ‘right’ response) and  
17 stimulus (left target or right target) constant (Kennedy and in Statistics-Simulation, 1996;  
18 Winkler et al., 2014). The permutation was carried out at the individual subject level 2,000  
19 times per dataset. Each surrogate dataset was fitted using the same model described in Eq. 5  
20 and the resulting  $\beta_1$  and  $\beta_2$  were averaged across subjects for every frequency tested. This  
21 yielded a joined distribution of 2,000 surrogate means for each frequency from 4-12 Hz in

---

<sup>1</sup> Binary responses can be modelled using a *generalised* linear model with a logit link function. In an ideal scenario in which the observer has no internal noise, simulation results suggest that the *generalised* linear model indeed outperforms the linear model; in more realistic settings, however, the two models yield comparable results (Knoblauch and Maloney, 2008) which our own simulations corroborate (not reported here).



1 0.1-Hz steps. Similar to the *multiple comparison correction* we applied in the *aggregate data*  
2 *analysis*, we determined the *maximal vector* of each joined distribution, irrespective of the  
3 frequency. This resulted in a joined distribution of 2,000 maximal vectors, against which we  
4 compared the original mean (see Fig. 4F). This comparison entails determining the  
5 proportion of surrogate amplitude group means equal or exceeding the original group mean.

6

## 7 **References**

- 8 Aagten-Murphy D, Burr D. 2016. Adaptation to numerosity requires only brief exposures,  
9 and is determined by number of events, not exposure duration. *Journal of Vision* **16**:22–22.  
10 doi:10.1167/16.10.22
- 11
- 12 Abrahamyan A, Silva L, Dakin SC, Carandini M, Gardner JL. 2016. Adaptable history biases  
13 in human perceptual decisions. *Proceedings of the National Academy of Sciences*  
14 **113**:E3548–E3557. doi:10.1073/pnas.1518786113
- 15
- 16 Addams R. 1834. An account of a peculiar optical phenomenon seen after having looked at a  
17 moving body. *Philosophical Mag Ser 3* **5**:373–374. doi:10.1080/14786443408648481
- 18
- 19 Alais D, Leung J, der Burg E. 2017. Linear Summation of Repulsive and Attractive Serial  
20 Dependencies: Orientation and Motion Dependencies Sum in Motion Perception. *The*  
21 *Journal of Neuroscience* **37**:4381–4390. doi:10.1523/JNEUROSCI.4601-15.2017
- 22
- 23 Alais D, Orchard-Mills E, der Burg E. 2015. Auditory frequency perception adapts rapidly to  
24 the immediate past. *Attention, Perception, & Psychophysics* **77**:896–906.  
25 doi:10.3758/s13414-014-0812-2
- 26
- 27 Alexi J, Cleary D, Dommissie K, Palermo R, Kloth N, Burr D, Bell J. 2018. Past visual  
28 experiences weigh in on body size estimation. *Scientific Reports* **8**:215. doi:10.1038/s41598-  
29 017-18418-3
- 30
- 31 Arzounian D, de Kerangal M, de Cheveigné A. 2017. Sequential dependencies in pitch  
32 judgments. *The Journal of the Acoustical Society of America* **142**:3047–3057.  
33 doi:10.1121/1.5009938
- 34
- 35 Benedetto A, Burr D, Morrone M. 2018. Perceptual Oscillation of Audio-Visual Time  
36 Simultaneity. *eNeuro* **5**:ENEURO.0047-18.2018. doi:10.1523/ENEURO.0047-18.2018
- 37
- 38 Benedetto A, Morrone M. 2017. Saccadic Suppression Is Embedded Within Extended  
39 Oscillatory Modulation of Sensitivity. *The Journal of Neuroscience* **37**:3661–3670.  
40 doi:10.1523/JNEUROSCI.2390-16.2016
- 41
- 42 Benedetto A, Spinelli D, Morrone CM. 2016. Rhythmic modulation of visual contrast  
43 discrimination triggered by action. *Proc R Soc Lond, B, Biol Sci* **283**:20160692.

- 1 doi:10.1098/rspb.2016.0692  
2  
3 Berens P. 2009. CircStat: a MATLAB toolbox for circular statistics. *J Stat Softw* **31**:1–21.  
4  
5 Bestelmeyer P, Rouger J, DeBruine LM, Belin P. 2010. Auditory adaptation in vocal affect  
6 perception. *Cognition* **117**:217–223. doi:10.1016/j.cognition.2010.08.008  
7  
8 Bowen R. 1989. Two pulses seen as three flashes: a superposition analysis. *Vision research*  
9 **29**:409–17.  
10  
11 Brainard DH. 1997. The Psychophysics Toolbox. *Spat Vis* **10**:433–436.  
12 doi:10.1163/156856897X00357  
13  
14 Burns BD, Corpus B. 2004. Randomness and inductions from streaks: “Gambler’s fallacy”  
15 versus ”hot hand“. *Psychonomic Bulletin & Review* **11**:179–184. doi:10.3758/BF03206480  
16  
17 Burr D, Ross J. 2008. A Visual Sense of Number. *Current Biology* **18**:425–428.  
18 doi:10.1016/j.cub.2008.02.052  
19  
20 Buzsáki G, Draguhn A. 2004. Neuronal oscillations in cortical networks. *Science (New York,*  
21 *NY)* **304**:1926–9. doi:10.1126/science.1099745  
22  
23 Chambers C, Pressnitzer D. 2014. Perceptual hysteresis in the judgment of auditory pitch  
24 shift. *Attention, Perception, & Psychophysics* **76**:1271–1279. doi:10.3758/s13414-014-0676-  
25 5  
26  
27 Chang AY, Schwartzman DJ, VanRullen R, Kanai R, Seth AK. 2017. Visual Perceptual Echo  
28 Reflects Learning of Regularities in Rapid Luminance Sequences. *The Journal of*  
29 *neuroscience : the official journal of the Society for Neuroscience* **37**:8486–8497.  
30 doi:10.1523/JNEUROSCI.3714-16.2017  
31  
32 Chopin A, Mamassian P. 2012. Predictive Properties of Visual Adaptation. *Current Biology*  
33 **22**:622–626. doi:10.1016/j.cub.2012.02.021  
34  
35 Cicchini G, Anobile G, Burr D. 2014. Compressive mapping of number to space reflects  
36 dynamic encoding mechanisms, not static logarithmic transform. *Proc National Acad Sci*  
37 **111**:7867–7872. doi:10.1073/pnas.1402785111  
38  
39 Cicchini G, Mikellidou K, Burr DC. 2018. The functional role of serial dependence. *Proc R*  
40 *Soc B* **285**:20181722. doi:10.1098/rspb.2018.1722  
41  
42 Craddock M, Poliakoff E, El-dereedy W, Klepousniotou E, Lloyd DM. 2017. Pre-stimulus  
43 alpha oscillations over somatosensory cortex predict tactile misperceptions.  
44 *Neuropsychologia* **96**:9–18. doi:10.1016/j.neuropsychologia.2016.12.030  
45  
46 de Lange FP, Rahnev DA, Donner TH, Lau H. 2013. Prestimulus Oscillatory Activity over  
47 Motor Cortex Reflects Perceptual Expectations. *The Journal of Neuroscience* **33**:1400–1410.  
48 doi:10.1523/JNEUROSCI.1094-12.2013  
49  
50 Dong DW, Atick JJ. 1995. Statistics of natural time-varying images. *Network: Computation*

- 1 *in Neural Systems* **6**:345–358. doi:10.1088/0954-898X\_6\_3\_003  
2
- 3 Engel A, Fries P, Singer W. 2001. Dynamic predictions: oscillations and synchrony in top-  
4 down processing. *Nature reviews Neuroscience* **2**:704–16. doi:10.1038/35094565  
5
- 6 Ernst MD. 2004. Permutation methods: a basis for exact inference. *Statistical Science*  
7 **19**:676–685. doi:10.1214/088342304000000396  
8
- 9 Faes L, Nollo G, Ravelli F, Ricci L, Vescovi M, Turatto M, Pavani F, Antolini R. 2007.  
10 Small-sample characterization of stochastic approximation staircases in forced-choice  
11 adaptive threshold estimation. *Percept Psychophys* **69**:254–62.  
12
- 13 Fiebelkorn IC, Foxe JJ, Butler JS, Mercier MR, Snyder AC, Molholm S. 2011. Ready, Set,  
14 Reset: Stimulus-Locked Periodicity in Behavioral Performance Demonstrates the  
15 Consequences of Cross-Sensory Phase Reset. *The Journal of Neuroscience* **31**:9971–9981.  
16 doi:10.1523/JNEUROSCI.1338-11.2011  
17
- 18 Fiebelkorn IC, Saalman YB, Kastner S. 2013. Rhythmic Sampling within and between  
19 Objects despite Sustained Attention at a Cued Location. *Curr Biol* **23**:2553–2558.  
20 doi:10.1016/j.cub.2013.10.063  
21
- 22 Fischer J, Whitney D. 2014. Serial dependence in visual perception. *Nat Neurosci* **17**:738–  
23 743. doi:10.1038/nn.3689  
24
- 25 Friston K. 2005. A theory of cortical responses. *Philosophical transactions of the Royal*  
26 *Society of London Series B, Biological sciences* **360**:815–36. doi:10.1098/rstb.2005.1622  
27
- 28 Friston KJ, Bastos AM, Pinotsis D, Litvak V. 2015. LFP and oscillations—what do they tell  
29 us? *Curr Opin Neurobiol* **31**:1–6. doi:10.1016/j.conb.2014.05.004  
30
- 31 García-Pérez MA. 2011. A cautionary note on the use of the adaptive up-down method. *J*  
32 *Acoust Soc Am* **130**:2098–107. doi:10.1121/1.3628334  
33
- 34 Gibson J, Radner M. 1937. Adaptation, after-effect and contrast in the perception of tilted  
35 lines. I. Quantitative studies. *Journal of Experimental Psychology* **20**:453/467.  
36
- 37 Grantham WD, Wightman FL. 1979. Auditory motion aftereffects. *Perception &*  
38 *Psychophysics* **26**:403–408. doi:10.3758/BF03204166  
39
- 40 Gray C, König P, Engel A, Singer W. 1989. Oscillatory responses in cat visual cortex exhibit  
41 inter-columnar synchronization which reflects global stimulus properties. *Nature* **338**:334–7.  
42 doi:10.1038/338334a0  
43
- 44 Green DM, Swets JA. 1966. Signal Detection Theory and Psychophysics, John Wiley. John  
45 Wiley.  
46
- 47 Gregory R. 1997. Knowledge in perception and illusion. *Philosophical transactions of the*  
48 *Royal Society of London Series B, Biological sciences* **352**:1121–7.  
49 doi:10.1098/rstb.1997.0095  
50

- 1 Haegens S, Vázquez Y, Zainos A, Alvarez M, Jensen O, Romo R. 2014. Thalamocortical  
2 rhythms during a vibrotactile detection task. *Proceedings of the National Academy of*  
3 *Sciences* **111**:E1797–E1805. doi:10.1073/pnas.1405516111  
4
- 5 Helmholtz H. 1867. *Handbuch der physiologischen Optik*, Voss. Voss.  
6
- 7 Ho HT, Leung J, Burr DC, Alais D, Morrone M. 2017. Auditory Sensitivity and Decision  
8 Criteria Oscillate at Different Frequencies Separately for the Two Ears. *Current Biology*.  
9 doi:10.1016/j.cub.2017.10.017  
10
- 11 Huang Q, Jia J, Han Q, Luo H. 2018. Fast-backward replay of sequentially memorized items  
12 in humans. *eLife* **7**:e35164. doi:10.7554/eLife.35164  
13
- 14 Iemi L, Busch NA. 2018. Moment-to-Moment Fluctuations in Neuronal Excitability Bias  
15 Subjective Perception Rather than Strategic Decision-Making. *eNeuro* **5**.  
16 doi:10.1523/ENEURO.0430-17.2018  
17
- 18 Iemi L, Chaumon M, Crouzet SM, Busch NA. 2017. Spontaneous Neural Oscillations Bias  
19 Perception by Modulating Baseline Excitability. *J Neurosci* **37**:807–819.  
20 doi:10.1523/JNEUROSCI.1432-16.2017  
21
- 22 Kanai R, Verstraten F. 2005. Perceptual manifestations of fast neural plasticity: Motion  
23 priming, rapid motion aftereffect and perceptual sensitization. *Vision Research* **45**:3109–  
24 3116. doi:10.1016/j.visres.2005.05.014  
25
- 26 Kashino M, Nishida S. 1998. Adaptation in the processing of interaural time differences  
27 revealed by the auditory localization aftereffect. *The Journal of the Acoustical Society of*  
28 *America* **103**:3597–604. doi:10.1121/1.423064  
29
- 30 Kennedy P, in Statistics-Simulation CB. 1996. Randomization tests for multiple regression.  
31 doi:10.1080/03610919608813350  
32
- 33 Klimesch W, Poppelmayr, Russegger H, Pachinger T, Schwaiger J. 1998. Induced alpha band  
34 power changes in the human EEG and attention. *Neuroscience Letters* **244**:73–76.  
35 doi:10.1016/S0304-3940(98)00122-0  
36
- 37 Knoblauch K, Maloney LT. 2008. Estimating classification images with generalized linear  
38 and additive models. *Journal of Vision* **8**:10–10. doi:10.1167/8.16.10  
39
- 40 Landau A, Fries P. 2012. Attention Samples Stimuli Rhythmically. *Curr Biol* **22**:1000–1004.  
41 doi:10.1016/j.cub.2012.03.054  
42
- 43 Lee TS, Mumford D. 2003. Hierarchical Bayesian inference in the visual cortex. *Journal of*  
44 *the Optical Society of America A, Optics, image science, and vision* **20**:1434–48.  
45
- 46 Leopold DA, O’Toole AJ, Vetter T, Blanz V. 2001. Prototype-referenced shape encoding  
47 revealed by high-level aftereffects. *Nature Neuroscience* **4**:nn0101\_89. doi:10.1038/82947  
48
- 49 Liberman A, Fischer J, Whitney D. 2014. Serial Dependence in the Perception of Faces.  
50 *Current Biology* **24**:2569–2574. doi:10.1016/j.cub.2014.09.025

- 1  
2 Limbach K, Corballis PM. 2016. Prestimulus alpha power influences response criterion in a  
3 detection task. *Psychophysiology* **53**:1154–1164. doi:10.1111/psyp.12666  
4  
5 Macmillan NA, Creelman DC. 2004. Detection theory: A user's guide, Lawrence Erlbaum  
6 Associates. Lawrence Erlbaum Associates.  
7  
8 Mayer A, hwiedrzik C, Wibrall M, Singer W, Melloni L. 2016. Expecting to See a Letter:  
9 Alpha Oscillations as Carriers of Top-Down Sensory Predictions. *Cerebral Cortex* **26**:3146–  
10 3160. doi:10.1093/cercor/bhv146  
11  
12 Neitz J, Carroll J, Yamauchi Y, Neitz M, Williams DR. 2002. Color Perception Is Mediated  
13 by a Plastic Neural Mechanism that Is Adjustable in Adults. *Neuron* **35**:783–792.  
14 doi:10.1016/S0896-6273(02)00818-8  
15  
16 Pantle AJ, Gallogly DP, Piehler OC. 2000. Direction biasing by brief apparent motion  
17 stimuli. *Vision Research* **40**:1979–1991. doi:10.1016/S0042-6989(00)00071-7  
18  
19 Peters MA, Ro T, Lau H. 2016. Who's afraid of response bias? *Neuroscience of*  
20 *Consciousness* **2016**:niw001. doi:10.1093/nc/niw001  
21  
22 Premereur E, Vanduffel W, Janssen P. 2012. Local Field Potential Activity Associated with  
23 Temporal Expectations in the Macaque Lateral Intraparietal Area. *Journal of Cognitive*  
24 *Neuroscience* **24**:1314–1330. doi:10.1162/jocn\_a\_00221  
25  
26 Rahnev D, Maniscalco B, Graves T, Huang E, de Lange FP, Lau H. 2011. Attention induces  
27 conservative subjective biases in visual perception. *Nature Neuroscience* **14**:1513.  
28 doi:10.1038/nn.2948  
29  
30 Reinhardt-Rutland A, Anstis S. 1982. Auditory adaptation to gradual rise or fall in intensity  
31 of a tone. *Perception & Psychophysics* **31**:63–67. doi:10.3758/BF03206201  
32  
33 Rohenkohl G, Nobre A. 2011. Alpha Oscillations Related to Anticipatory Attention Follow  
34 Temporal Expectations. *J Neurosci* **31**:14076–14084. doi:10.1523/JNEUROSCI.3387-  
35 11.2011  
36  
37 Sanders LL, Aukstulewicz R, Hohlefeld FU, Busch NA, Sterzer P. 2014. The influence of  
38 spontaneous brain oscillations on apparent motion perception. *NeuroImage* **102 Pt 2**:241–8.  
39 doi:10.1016/j.neuroimage.2014.07.065  
40  
41 Schweinberger SR, Casper C, Hauthal N, Kaufmann JM, Kawahara H, Kloth N, Robertson  
42 D, Simpson AP, Zäske R. 2008. Auditory Adaptation in Voice Perception. *Current Biology*  
43 **18**:684–688. doi:10.1016/j.cub.2008.04.015  
44  
45 Sherman MT, Kanai R, Seth AK, VanRullen R. 2016. Rhythmic Influence of Top-Down  
46 Perceptual Priors in the Phase of Prestimulus Occipital Alpha Oscillations. *J Cogn Neurosci*  
47 **28**:1–13. doi:10.1162/jocn\_a\_00973  
48  
49 Summerfield C, de Lange FP. 2014. Expectation in perceptual decision making: neural and  
50 computational mechanisms. *Nature Reviews Neuroscience* **15**:nrn3838. doi:10.1038/nrn3838

- 1  
2 Summerfield C, Koechlin E. 2008. A neural representation of prior information during  
3 perceptual inference. *Neuron* **59**:336–47. doi:10.1016/j.neuron.2008.05.021  
4
- 5 Taubert J, Alais D, Burr D. 2016. Different coding strategies for the perception of stable and  
6 changeable facial attributes. *Scientific Reports* **6**:32239. doi:10.1038/srep32239  
7
- 8 Thompson P, Burr D. 2009. Visual aftereffects. *Current Biology* **19**:R11–R14.  
9 doi:10.1016/j.cub.2008.10.014  
10
- 11 Tomassini A, Ambrogioni L, Medendorp PW, Maris E. 2017. Theta oscillations locked to  
12 intended actions rhythmically modulate perception. *eLife* **6**:e25618. doi:10.7554/eLife.25618  
13
- 14 Tomassini A, Spinelli D, Jacono M, Sandini G, Morrone M. 2015. Rhythmic Oscillations of  
15 Visual Contrast Sensitivity Synchronized with Action. *J Neurosci* **35**:7019–7029.  
16 doi:10.1523/jneurosci.4568-14.2015  
17
- 18 Tversky A, Kahneman D. 1971. Belief in the law of small numbers. *Psychological Bulletin*  
19 **76**:105. doi:10.1037/h0031322  
20
- 21 VanRullen R. 2017. Predictive Coding and Neural Communication Delays Produce Alpha-  
22 Band Oscillatory Impulse Response FunctionsConference on Cognitive Computational  
23 Neuroscience .  
24
- 25 VanRullen R, Macdonald J. 2012. Perceptual Echoes at 10 Hz in the Human Brain. *Current*  
26 *Biology* **22**:995–999. doi:10.1016/j.cub.2012.03.050  
27
- 28 VanRullen R, Zoefel B, Ilhan B. 2014. On the cyclic nature of perception in vision versus  
29 audition. *Philos Trans R Soc Lond, B, Biol Sci* **369**:20130214. doi:10.1098/rstb.2013.0214  
30
- 31 Voss R. 1975. “1/f noise” in music and speech. *Nature* **258**:317–318.  
32
- 33 Voss R, Clarke J. 1978. “1/f noise” in music: Music from 1/f noise. *The Journal of the*  
34 *Acoustical Society of America* **63**:258–263.  
35
- 36 Winkler AM, Ridgway GR, Webster MA, Smith SM, Nichols TE. 2014. Permutation  
37 inference for the general linear model. *NeuroImage* **92**:381–397.  
38 doi:10.1016/j.neuroimage.2014.01.060  
39
- 40 Witt JK, Taylor J, Sugovic M, Wixted JT. 2015. Signal Detection Measures Cannot  
41 Distinguish Perceptual Biases from Response Biases. *Perception* **44**:289–300.  
42 doi:10.1068/p7908  
43
- 44 Yoshimoto S, Uchida-Ota M, Takeuchi T. 2014. The reference frame of visual motion  
45 priming depends on underlying motion mechanisms. *Journal of Vision* **14**:10–10.  
46 doi:10.1167/14.1.10  
47
- 48 Yuille A, Kersten D. 2006. Vision as Bayesian inference: analysis by synthesis? *Trends in*  
49 *Cognitive Sciences* **10**:301–308. doi:10.1016/j.tics.2006.05.002  
50

- 1 Zoefel B, Heil P. 2013. Detection of Near-Threshold Sounds is Independent of EEG Phase in  
2 Common Frequency Bands. *Frontiers in Psychology* **4**:262. doi:10.3389/fpsyg.2013.00262  
3  
4 Zoefel B, Pasham N, Brüers S, VanRullen R. 2015. The ability of the auditory system to cope  
5 with temporal subsampling depends on the hierarchical level of processing. *NeuroReport*  
6 **26**:773. doi:10.1097/WNR.0000000000000422  
7  
8 Zoefel B, VanRullen R. 2017. Oscillatory Mechanisms of Stimulus Processing and Selection  
9 in the Visual and Auditory Systems: State-of-the-Art, Speculations and Suggestions. *Front*  
10 *Neurosci* **11**:296. doi:10.3389/fnins.2017.00296  
11
